# Supplementary figures and images for: Crowding-induced phase separation of nuclear transport receptors in FG nucleoporin assemblies
Source: eLife journal article supplement (doi:10.7554/elife.72627), 2022-01-31

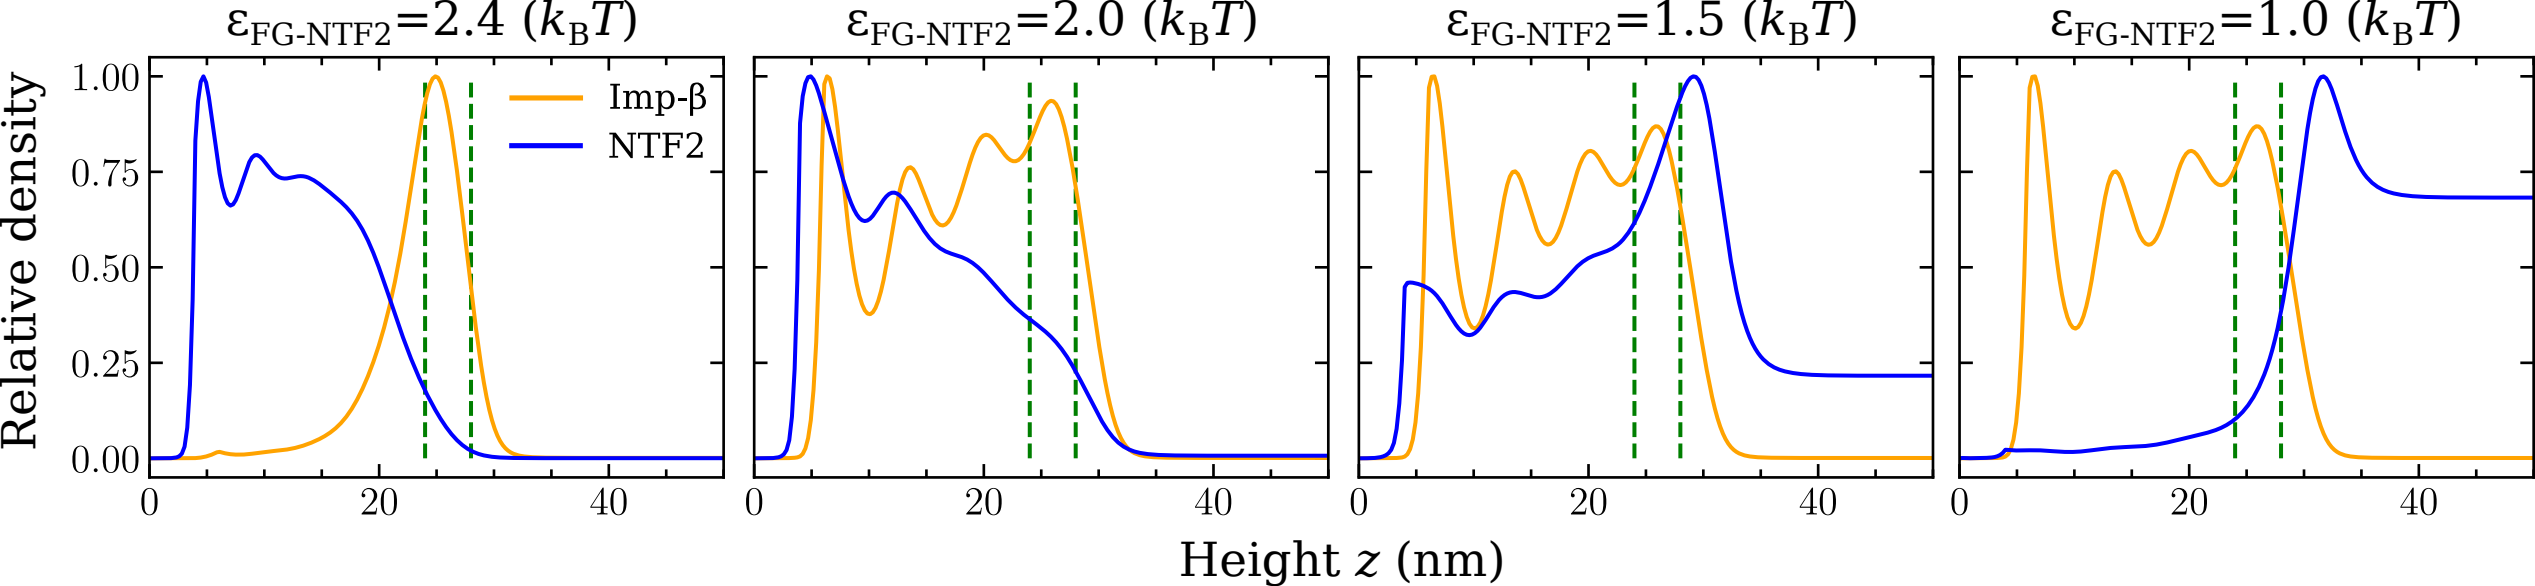

Supplement: supp [file elife-72627-supp-v1.zip]

a)

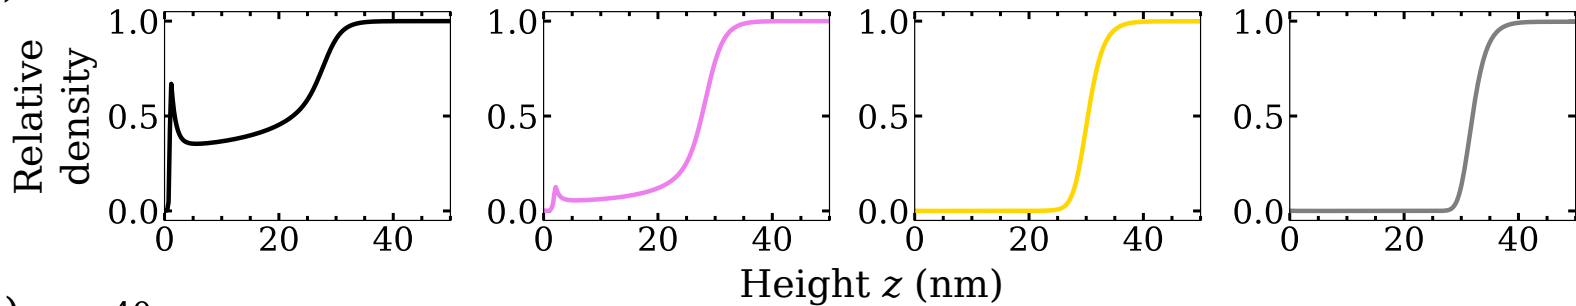

b)

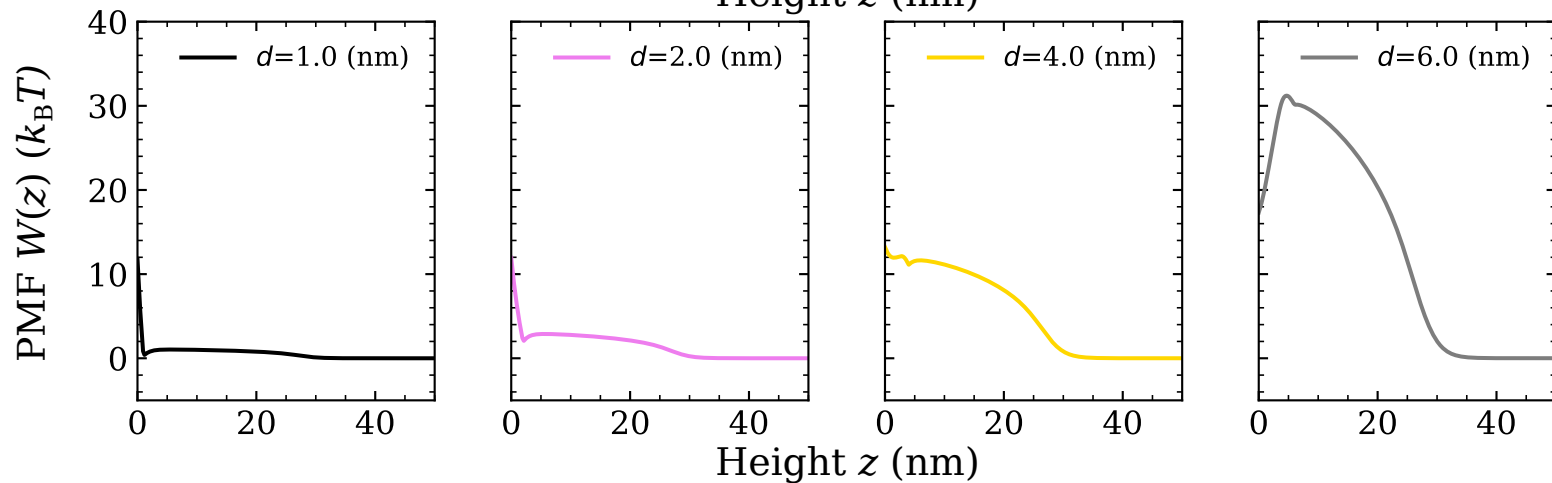

Supplement: supp [file elife-72627-supp-v1.zip]

a)

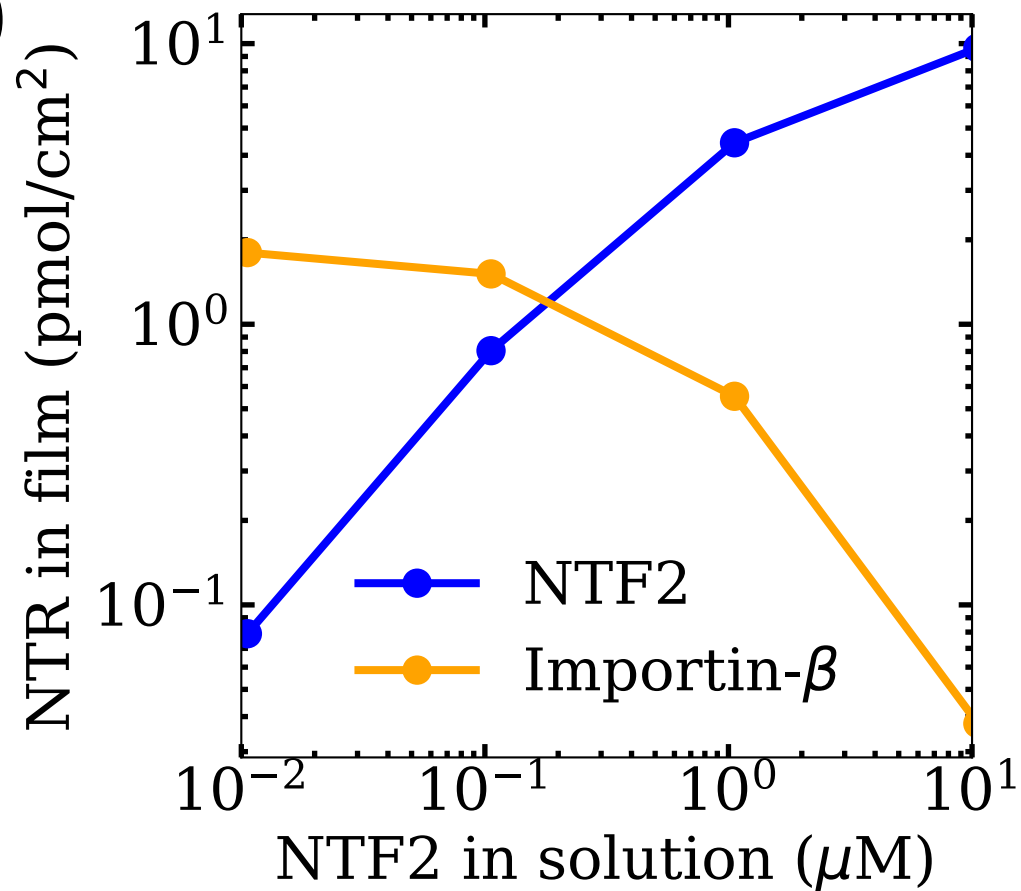

b)

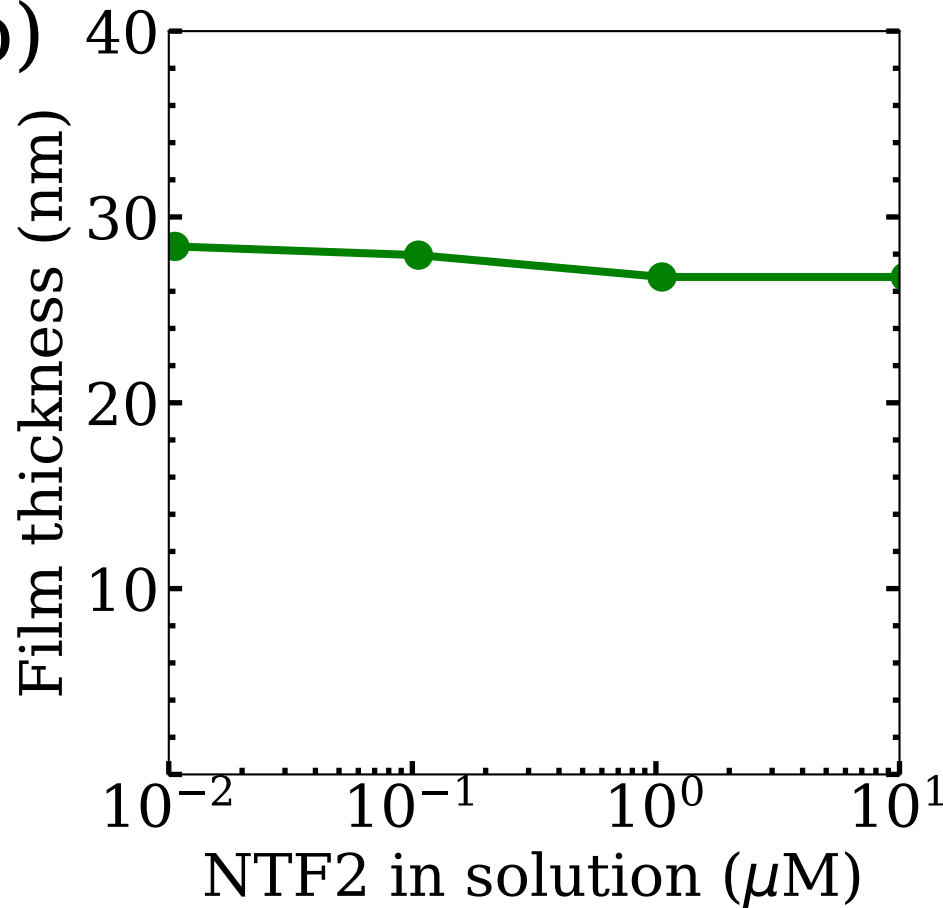

Supplement: supp [file elife-72627-supp-v1.zip]

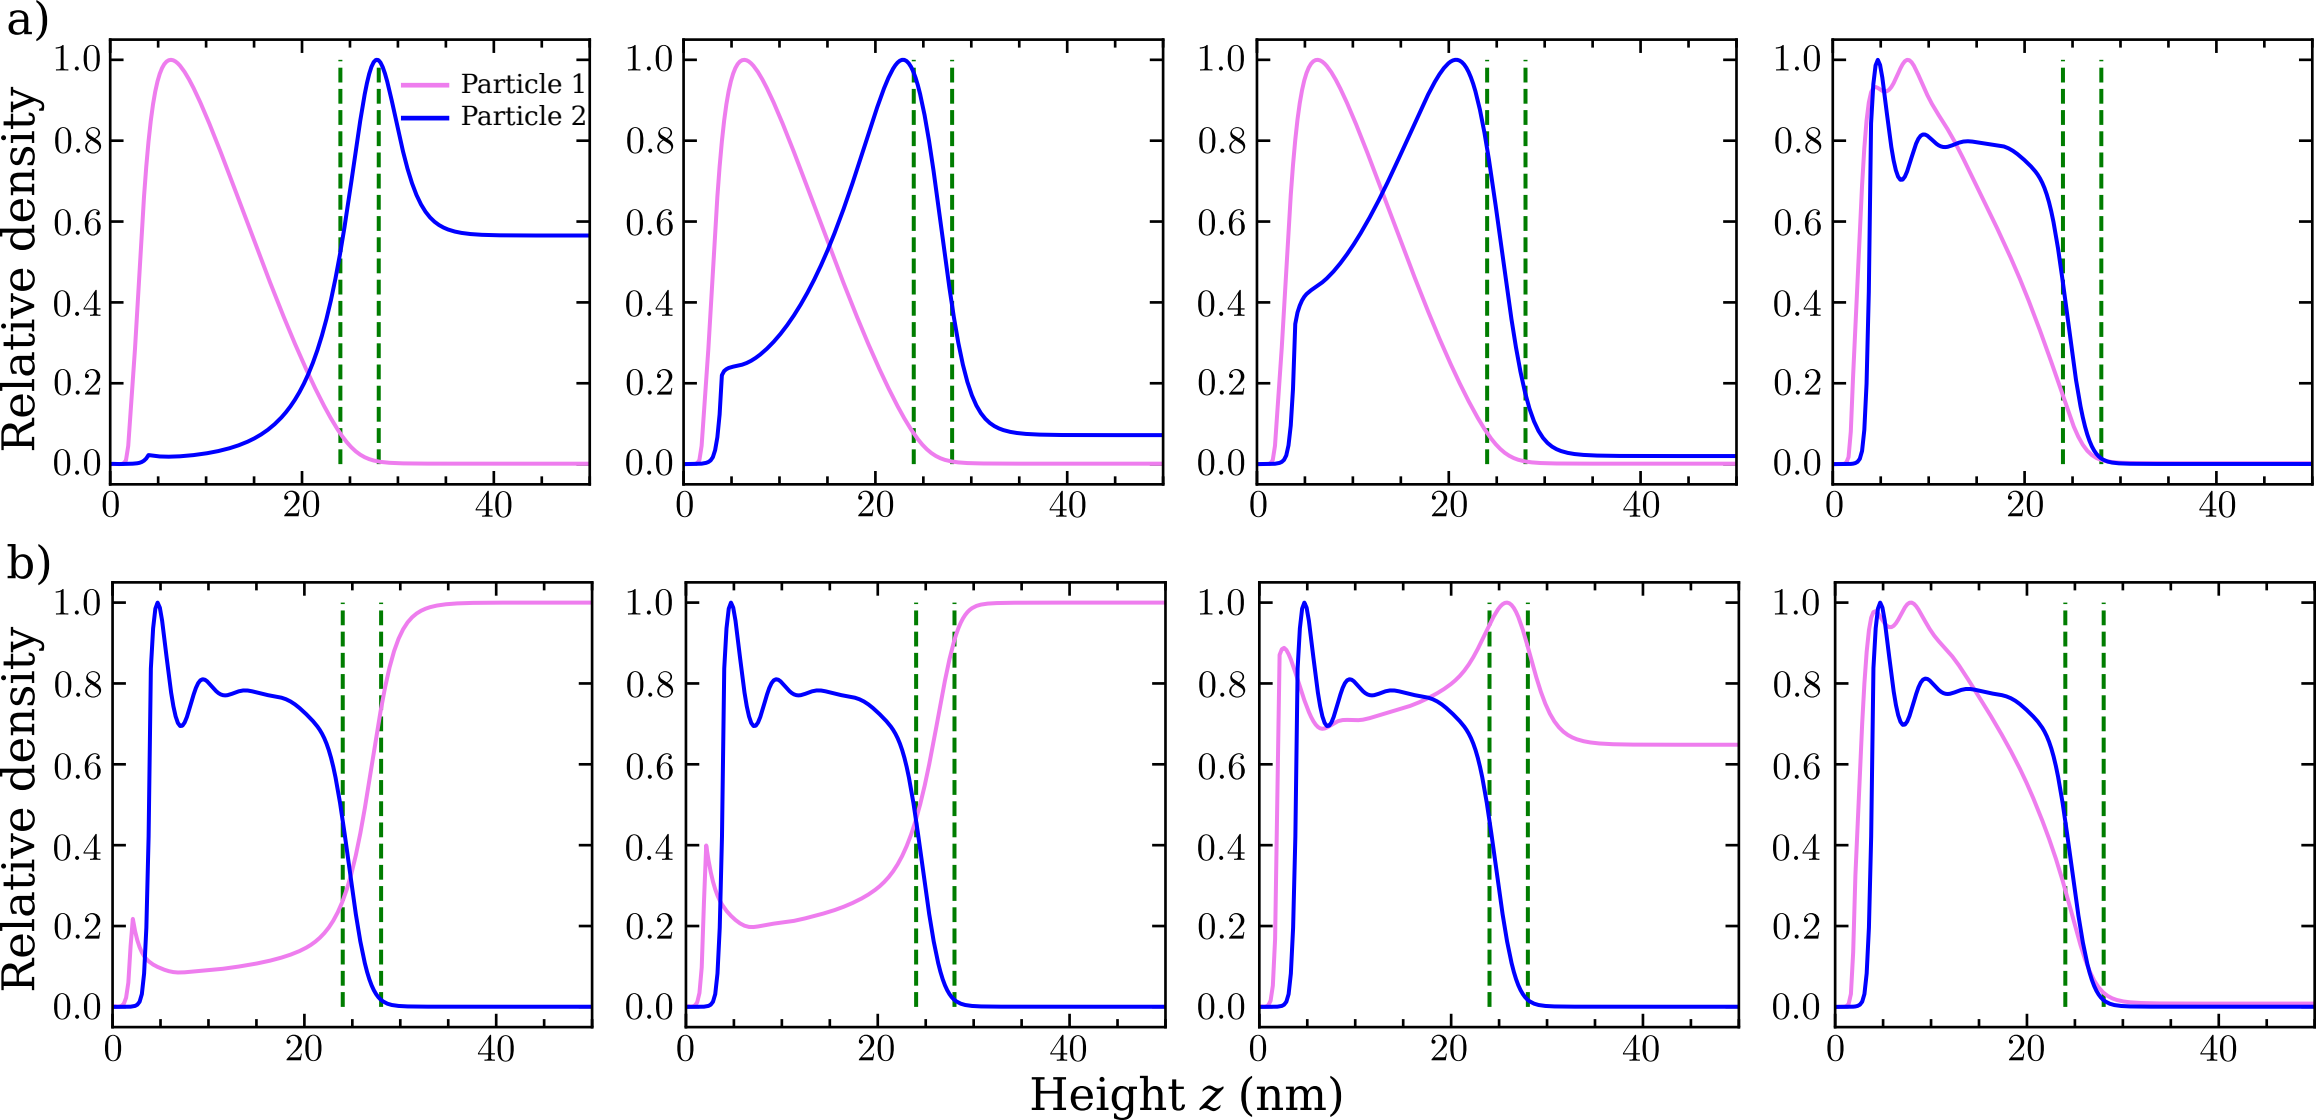

Supplement: supp [file elife-72627-supp-v1.zip]

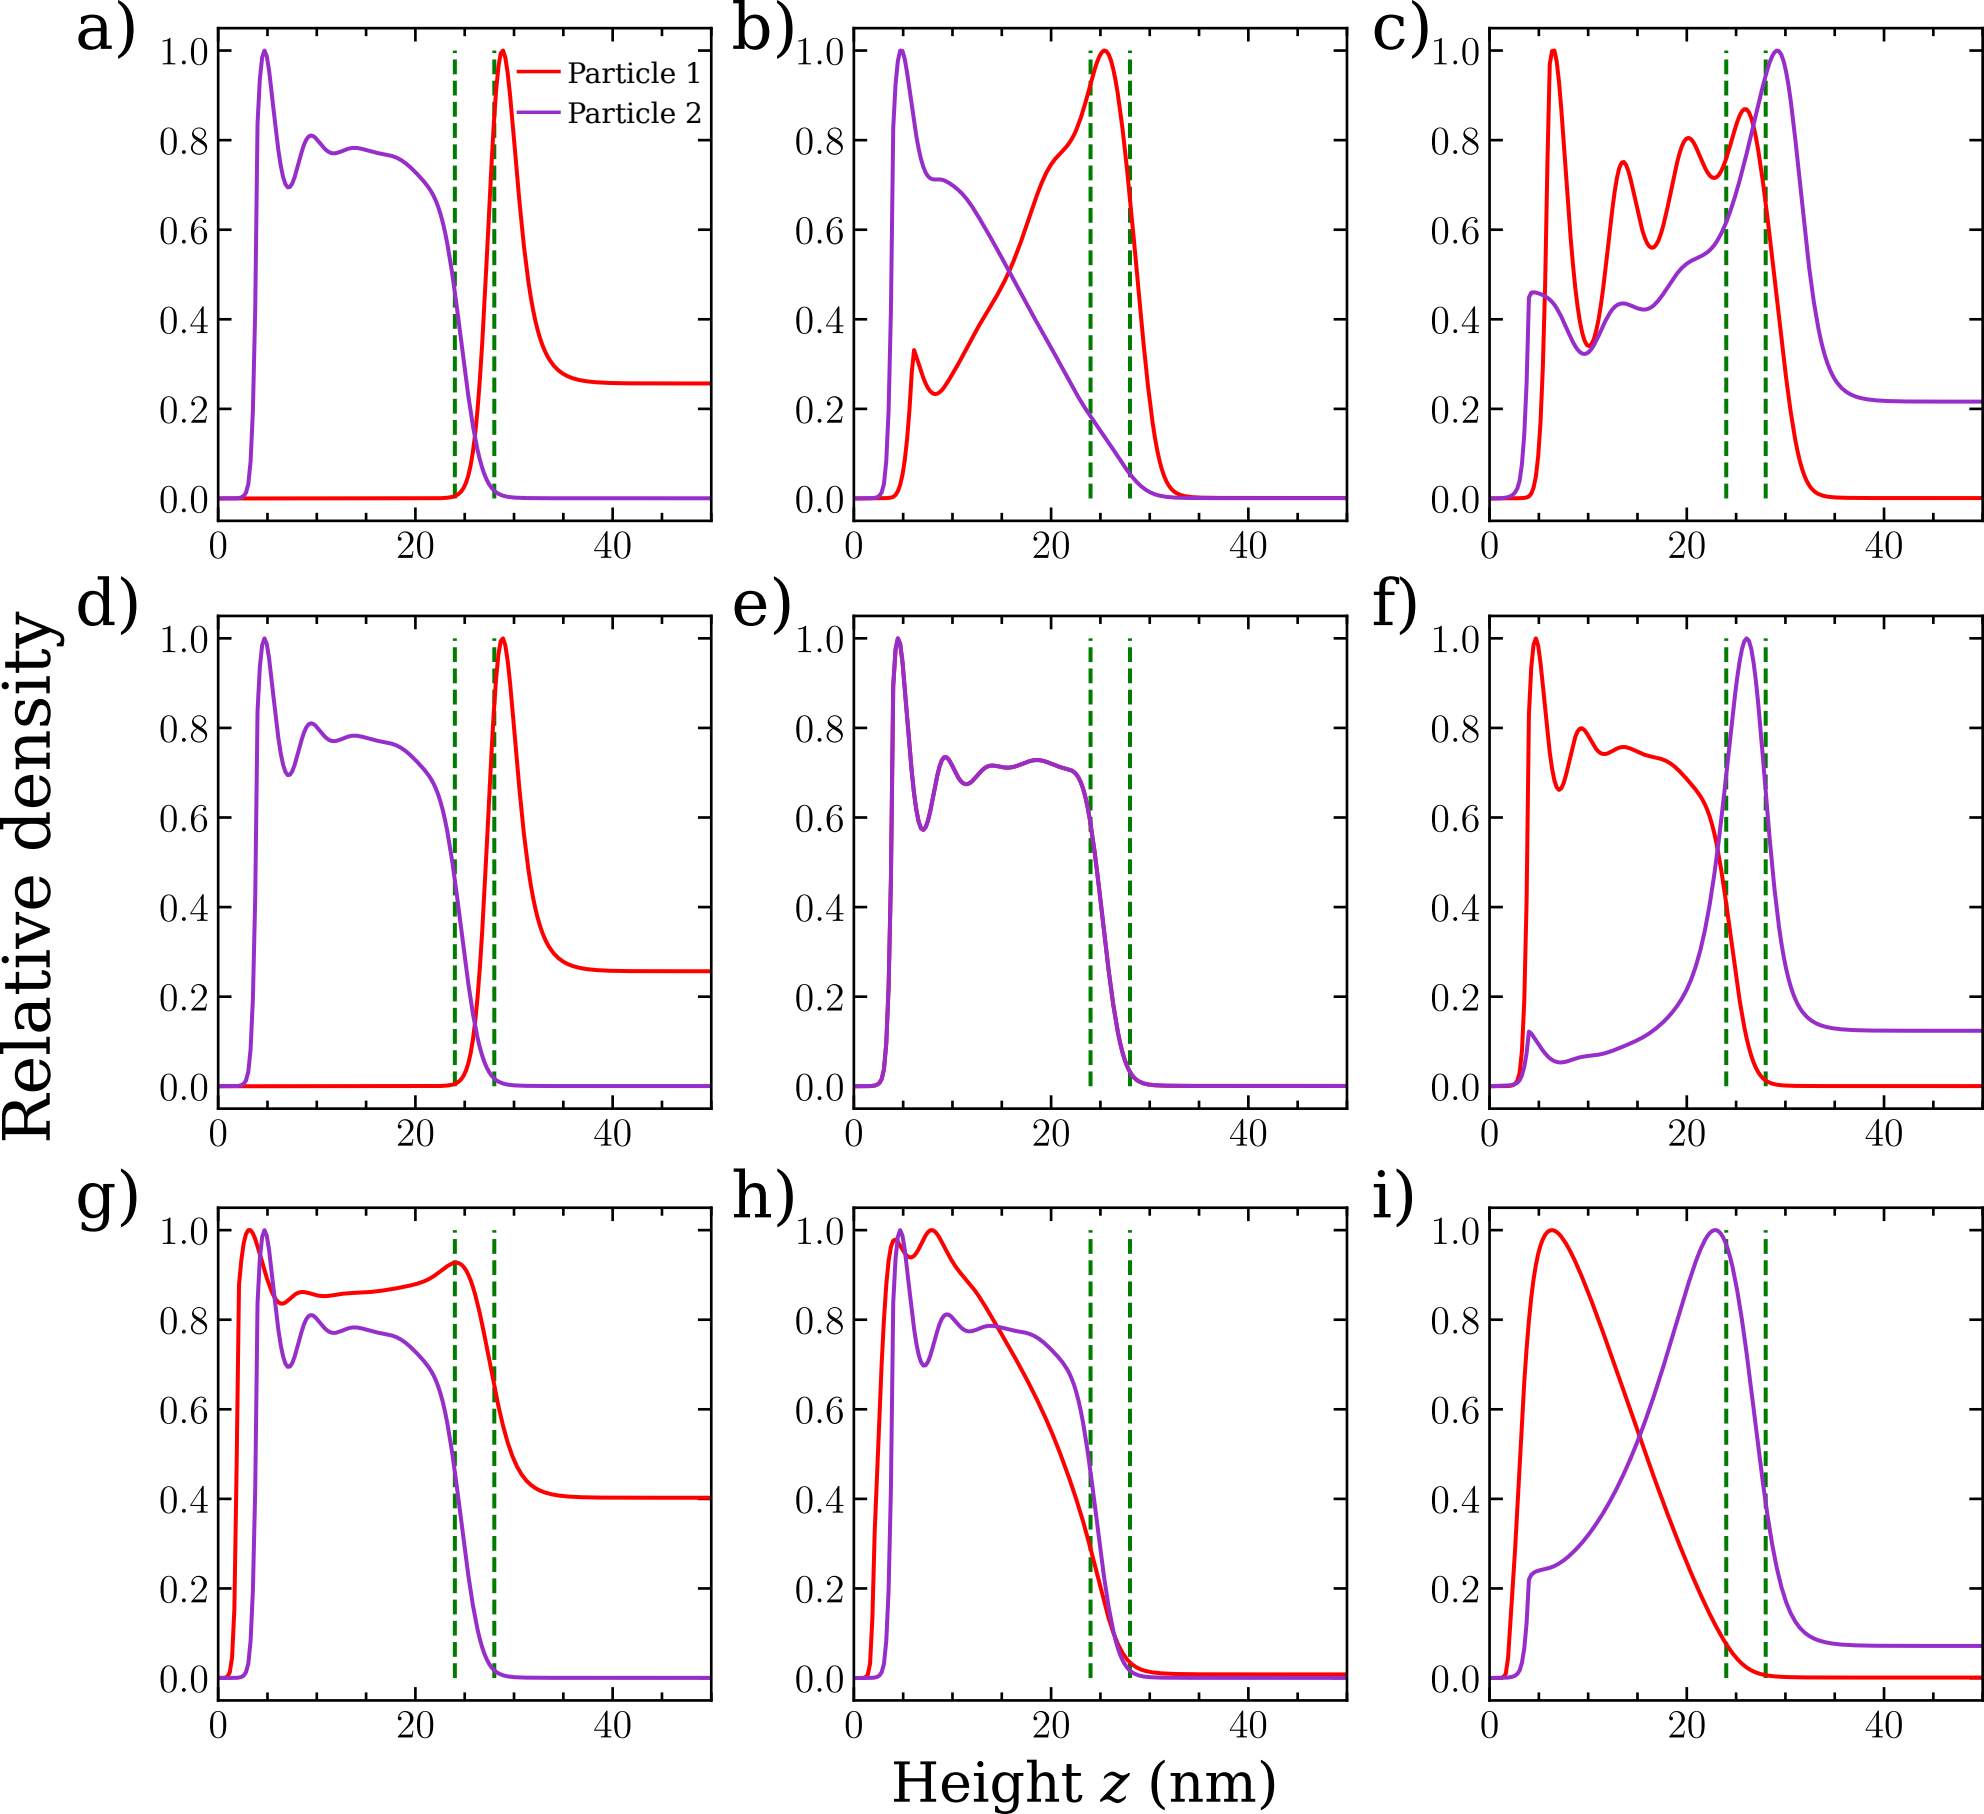

Supplement: supp [file elife-72627-supp-v1.zip]

a)

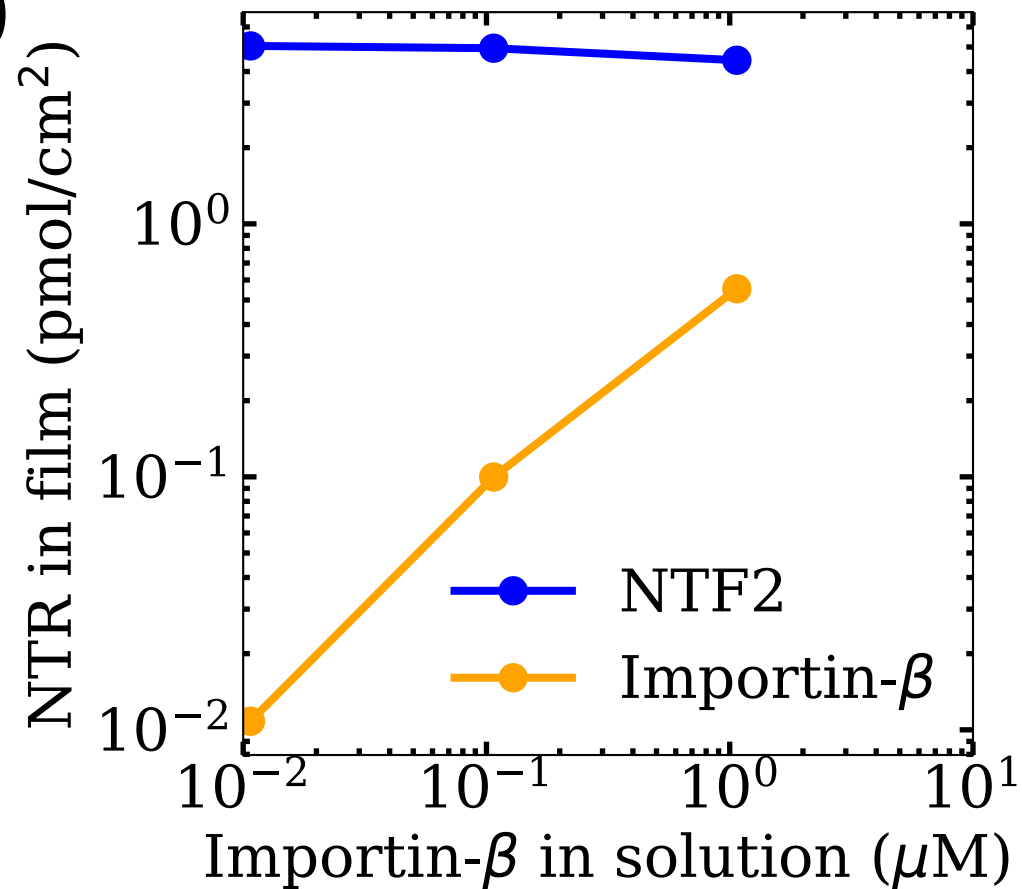

b)

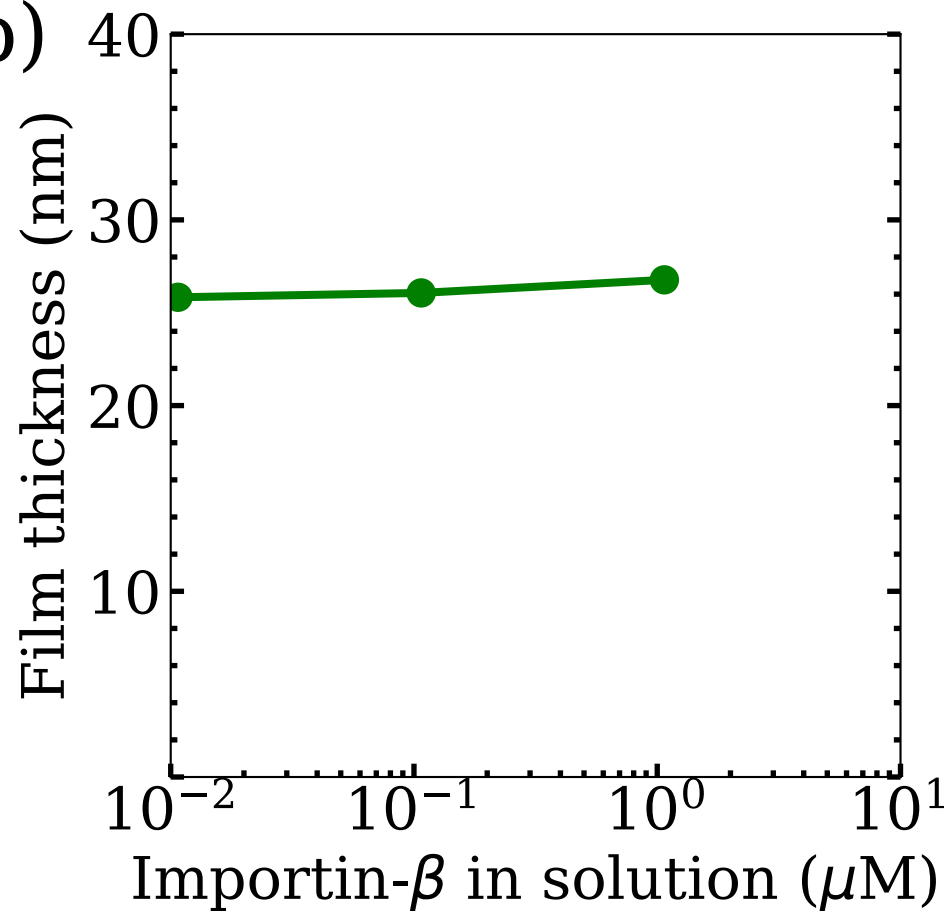

Supplement: supp [file elife-72627-supp-v1.zip]

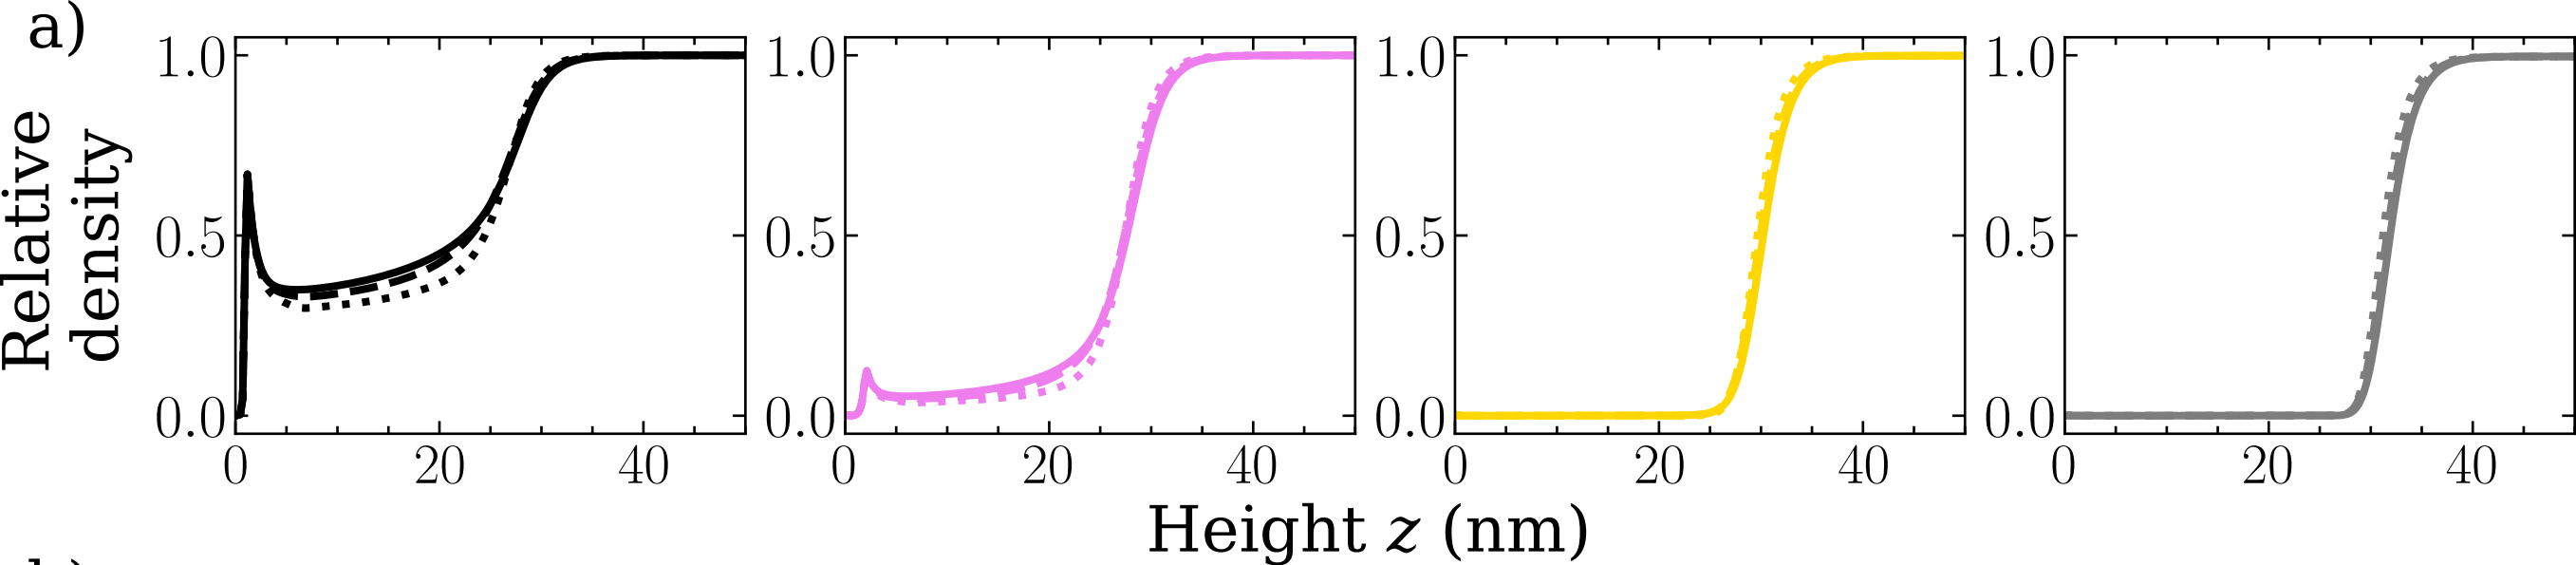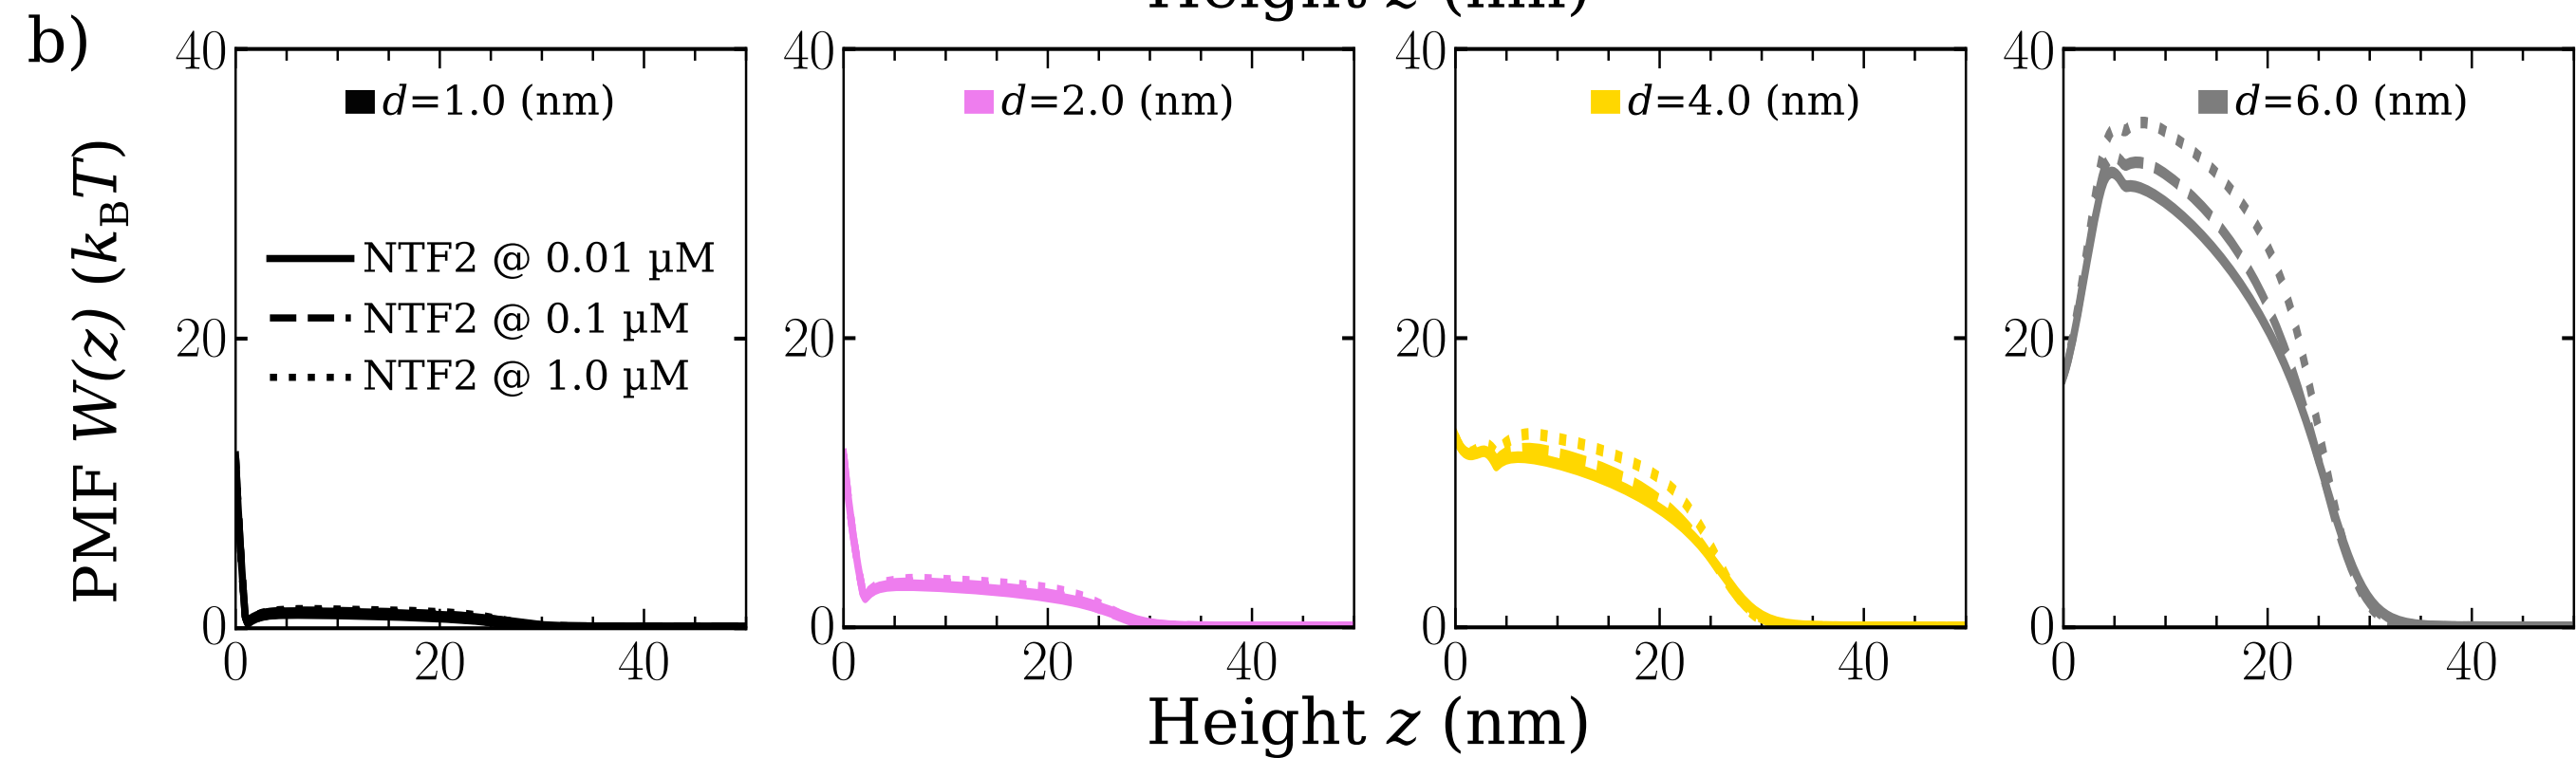

Supplement: supp [file elife-72627-supp-v1.zip]

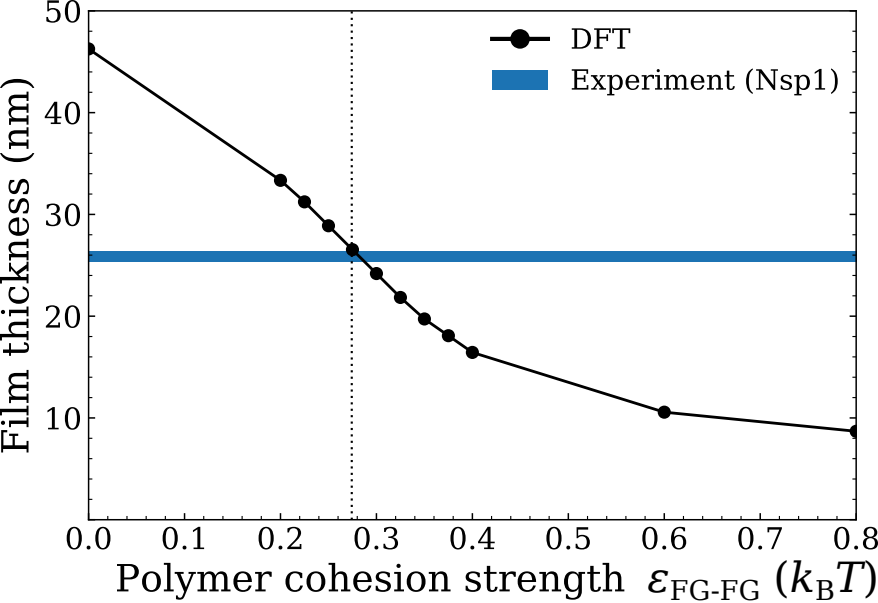

Supplement: supp [file elife-72627-supp-v1.zip]
